# Supplementary material for: Disentangling Substance Use and Disorder: Urgency, But Not Sensation Seeking, Predicts Substance-Related Problems Above and Beyond The Degree of Substance Use.
Source: Research Square preprint supplement (doi:10.21203/rs.3.rs-108038/v1), 2020-11-24
Supplement: Supplementary file 1 [file 0ff047151571c1ed3c8ae67c.docx]

**Disentangling Substance Use and Disorder: Urgency, but not Sensation Seeking, Predicts Substance-Related Problems Above and Beyond the Degree of Substance Use.**

**Supplementary Material**

**1. Method – Participants**

Participants with upper and intermediate degrees did not differ significantly on any of the variables relevant for our analyses (all *p*s > .05), except for higher delay discounting in participants with intermediate degrees (log(*k*); *t*(252) = 3.52, *p* < .001). Due to the skewed distribution of school education, we did not compute comparisons with the lower degree group. Age was not significantly associated with any of the variables relevant for our analyses (all *p*s > .05).

**2. Results**

Here, we provide the results of the analyses using total frequency (sum of all substance-specific frequency scores) rather than the total degree of substance use score.

**2.1 Bivariate correlations**

**Supplementary Table S 1**

*Means, Standard Deviations, and Correlations with Confidence Intervals for UPPS subscales, Delay Discounting (log(k)), Substance Use Frequency and Substance-Related Problems*

|  |  | *M* | *SD* | 1 | 2 | 3 | 4 | 5 | 6 |
| --- | --- | --- | --- | --- | --- | --- | --- | --- | --- |
|  | **UPPS** |  |  |  |  |  |  |  |  |
| 1. | Urgency | 26.77 | 5.96 |  |  |  |  |  |  |
|  |  |  |  |  |  |  |  |  |  |
| 2. | Premeditation | 23.59 | 4.50 | .32** |  |  |  |  |  |
|  |  |  |  | [.20, .42] |  |  |  |  |  |
|  |  |  |  |  |  |  |  |  |  |
| 3. | Persistence | 20.40 | 4.41 | .40** | .26** |  |  |  |  |
|  |  |  |  | [.29, .50] | [.14, .37] |  |  |  |  |
|  |  |  |  |  |  |  |  |  |  |
| 4. | Sensation Seeking | 32.00 | 7.26 | -.00 | .32** | .01 |  |  |  |
|  |  |  |  | [-.12, .12] | [.21, .43] | [-.12, .13] |  |  |  |
|  | **MCQ** |  |  |  |  |  |  |  |  |
| 5. | log (*k*) | -2.28 | 0.75 | .14* | -.00 | .04 | -.01 |  |  |
|  |  |  |  | [.01, .25] | [-.12, .12] | [-.08, .16] | [-.14, .11] |  |  |
|  | **Substance use variables** | |  |  |  |  |  |  |  |
| 6. | Substance use frequency | 13.74 | 6.35 | .14** | .13* | .20** | .36** | .15** |  |
|  |  |  |  | [.01, .25] | [.01, .25] | [.08, .31] | [.25, .46] | [.03, .27] |  |
|  |  |  |  |  |  |  |  |  |  |
| 7. | Substance-related problems | 4.15 | 2.85 | .33** | .13* | .29** | .23** | .15* | .50** |
|  |  |  |  | [.22, .43] | [.01, .25] | [.17, .39] | [.11, .35] | [.03, .27] | [.41, .59] |
|  |  |  |  |  |  |  |  |  |  |

*Note.* *M* and *SD* represent mean and standard deviation, respectively. Values in square brackets indicate the 95% confidence interval. UPPS = Urgency Premeditation Perseverance Sensation Seeking Impulsive Behavior Scale, MCQ = Monetary Choice Questionnaire, *k* = delay discounting. * *p* < .05. ** *p* < .01.

**2.2 Partial correlations**

When controlling for substance use frequency, urgency (*r*(256)= .31, *p* < .001) and perseverance (*r*(256)= .22, *p* = .001) were significantly correlated with substance-related problems, while premeditation, sensation seeking and log(*k*) were not (all *p*s >.05).

**2.3 Relative contributions of impulsivity facets and delay discounting to substance use outcomes**

**Supplementary Table S 2**

*Hierarchical Multiple Regression Analyses with the UPPS Subscales and Delay Discounting Predicting Substance Use Frequency and Substance-Related Problems*

|  | Substance use frequency | | | | |  | Substance-related problems | | | | |
| --- | --- | --- | --- | --- | --- | --- | --- | --- | --- | --- | --- |
|  | ΔR2 | F | B | SE | β |  | ΔR2 | F | B | SE | β |
| *Step 1* | .083** | 23.05 |  |  |  |  | .017* | 4.432 |  |  |  |
| Male gender |  |  | 3.70 | 0.78 | .29** |  |  |  | 0.75 | 0.35 | .13* |
|  |  |  |  |  |  |  |  |  |  |  |  |
| *Step 2* | - | - |  |  |  |  | .239** | 81.26 |  |  |  |
| Male gender |  |  | - |  | - |  |  |  | -0.09 | 0.32 | -.02 |
| Substance use frequency |  |  | - |  | - |  |  |  | 0.23 | 0.03 | .51** |
|  |  |  |  |  |  |  |  |  |  |  |  |
| *Step 3 - UPPS* | .118** | 9.32 |  |  |  |  | .091** | 8.66 |  |  |  |
| Male gender |  |  | 2.29 | 0.84 | .18** |  |  |  | -0.04 | 0.34 | -.01 |
| Substance use frequency |  |  | - | - | - |  |  |  | 0.19 | 0.03 | .42** |
| Urgency |  |  | 0.13 | 0.07 | .13 |  |  |  | 0.13 | 0.03 | .25** |
| Premeditation |  |  | -0.04 | 0.09 | -.03 |  |  |  | -0.03 | 0.04 | -.06 |
| Perseverance |  |  | 0.20 | 0.09 | .14* |  |  |  | 0.07 | 0.04 | .11 |
| Sensation seeking |  |  | 0.26 | 0.06 | .30** |  |  |  | 0.04 | 0.02 | .10 |
|  |  |  |  |  |  |  |  |  |  |  |  |
| *Step 4 - MCQ* | .014* | 4.27 |  |  |  |  | .003 | 0.97 |  |  |  |
| Male gender |  |  | 2.04 | 0.85 | .16* |  |  |  | -0.01 | 0.35 | -.00 |
| Substance use frequency |  |  | - |  |  |  |  |  | 0.18 | 0.03 | .41** |
| Urgency |  |  | 0.11 | 0.07 | .10 |  |  |  | 0.12 | 0.03 | .25** |
| Premeditation |  |  | -0.04 | 0.09 | -.03 |  |  |  | -0.03 | 0.04 | -.06 |
| Perseverance |  |  | 0.21 | 0.09 | .14* |  |  |  | 0.07 | 0.04 | .12* |
| Sensation seeking |  |  | 0.27 | 0.06 | .31** |  |  |  | 0.04 | 0.02 | .11 |
| Log(*k*) |  |  | 1.00 | 0.49 | .12* |  |  |  | 0.20 | 0.20 | .05 |
|  |  |  |  |  |  |  |  |  |  |  |  |
| Total R2 | .215** | 11.4 |  |  |  |  | .349** | 19.08 |  |  |  |

*Note.* *ΔR2* = change in proportion of explained variance; B = unstandardized estimate; SE = standard error of B, β = standardized estimate. * *p* < .05. ** *p* < .01.
